# Supplementary figures and images for: Neuronal programmed cell death induces glial cell division in the adultDrosophilabrain
Source: Oxford University Press journal article supplement (doi:10.1242/dev.023366), 2008-11-20

**A**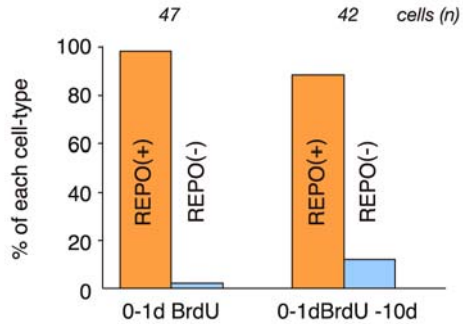**B**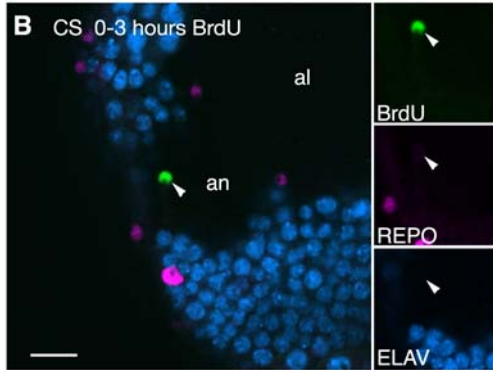

Supplement: dev023366-sup-023366-figs1.pdf [file dev023366-sup-023366-figs1.pdf]

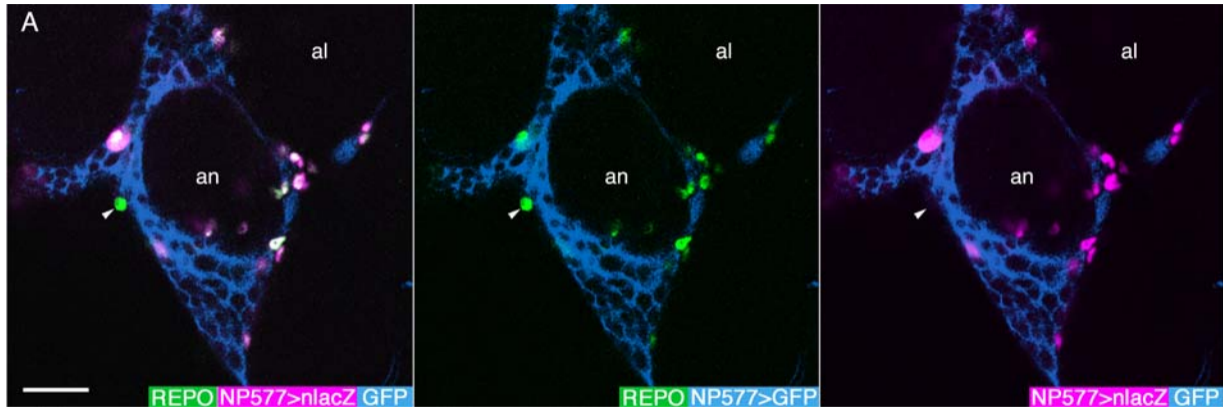

Supplement: dev023366-sup-023366-figs2.pdf [file dev023366-sup-023366-figs2.pdf]
